# Supplementary material
Source: PubMed Central journal article supplement (PMC6497570)

## Supplementary Materials

**Table 1: Antibodies and primers used in qRT-PCR**

| <b>RT PCR Primers</b>          |                            |                             |
|--------------------------------|----------------------------|-----------------------------|
| <b>Gene</b>                    | <b>Forward 5'-3'</b>       | <b>Reverse 5'-3'</b>        |
| <b>FoxM1</b>                   | GCAGGCTGCACTATCAACAA       | TCGAAGGCTCCTCAACCTTA        |
| <b>FoxA2</b>                   | CTTCAAGCACCTGCAGATTC       | AGACCTGGATTTCACCGTGT        |
| <b>c-Myc</b>                   | TAGTGGAAAACCAGCAGCCTCC     | CCTCGTCGCAGTAGAAATACGG      |
| <b>Sox2</b>                    | TGAATGCCTTCATGGTGTGGTC     | CCGTCTCCGACAAAAGTTTCC       |
| <b>Oct4</b>                    | GGGGTTCTATTTGGGAAGGTATTC   | GGTTCGCTTTCTCTTTCCGGG       |
| <b>Nanog</b>                   | CCAGTCCCAAAGGCAAACAAC      | TGGAGGCTGAGGTATTTCTGTCTC    |
| <b>FYN</b>                     | GGTGTGAACCTTTCGTCTCATAAC   | CTTCTGTCCGTGCTTCATAGTC      |
| <b>Survivin</b>                | TCAAGGACCACCGCATCTCTA      | TGAAGCAGAAGAAACACTGGGC      |
| <b>Aurora B</b>                | ATCTGCTCTTAGGGCCAAGGG      | CACATTGTCTTCCTCCTCAGGG      |
| <b>ALB</b>                     | GTTGCCAAGCTGCTGATAAAG      | GGCACACTTGAGTCTCTGTT        |
| <b>AAT</b>                     | TGGGTGCTGCTGATGAAATA       | GTGATGATATCGTGGGTGAGTT      |
| <b>HNF4<math>\alpha</math></b> | CCTACCTCAAAGCCATCATCTT     | GTCGTTGATGTAGTCCTCCAAG      |
| <b>GAPDH</b>                   | ACACCCACTCCTCCACCTTT       | TTCCTCTTGTGCTCTTGCTG        |
| <b>CHIP primers</b>            |                            |                             |
| <b>Gene</b>                    | <b>Forward 5'-3'</b>       | <b>Reverse 5'-3'</b>        |
| <b>FoxA2 (-1294)</b>           | GGACAGAGACGCTCTTGAA        | AAACAGGGCAGGAGGTG           |
| <b>FoxA2 (-3581)</b>           | CATATCTGCCTTATGTTGC        | CACATGAAACCAACCAGTGC        |
| <b>FoxA2 (-4156)</b>           | CTGGTCTTTTGACCATCCAAGAAC   | GGCCCATGCCTATAATCCCAGCTAC   |
| <b>FoxA2 (-4535)</b>           | GAGAATGTAATAATAAAGTAGTG    | GGGGGAGGCAAGGTGCAACATT      |
| <b>Non-Specific</b>            | TTTTACGGGGCAACTACGGC       | CAGTGGCATTAGCAGGTC          |
| <b>FoxM1 (-580)</b>            | CATTGTATCTTCAGGGCCTAGC     | AGCGCGAAACCTGTCTTT          |
| <b>FoxM1 (-739)</b>            | CCCAGCCCACATTTGTTTATTT     | CAATGGCAGACAAGGTTCTTTC      |
| <b>FoxM1 (-1029)</b>           | TTCCTGTCCTACCTCTCAAGAT     | GGCGACAGAGGGGAGACA          |
| <b>FoxM1 (-1830)</b>           | AGAGCAAGACCCTGTCTCTA       | ACTACAAAGCAATGCTCAGAATG     |
| <b>FoxM1 (-2585)</b>           | GCAAACCTCATCTGCCTGTATTTT   | GGGTCCCAAACCTAAGGAATTCTA    |
| <b>FoxM1 (-2761)</b>           | CAGAAGACATCAAAGGAAATACTCTC | CAGCAGAATGAACTGACCTCTA      |
| <b>FoxM1 (-3420)</b>           | AGCTATGATCGTGCCACTG        | GAGATCACGCTACTGCACTC        |
| <b>MSP Primers (Human)</b>     |                            |                             |
| <b>Gene</b>                    | <b>Forward 5'-3'</b>       | <b>Reverse 5'-3'</b>        |
| <b>FoxA2 (-356)</b>            | CGCGTTATATTATTAGTTTTTTACGT | CAATACCGAACTACCCCGAA        |
| <b>FoxA2 (-882)</b>            | GGTTTTTATAGGGATTTGTCCG     | AAAAAAAAACCACCTCTAAAACG     |
| <b>FoxA2 (-1080)</b>           | AATTTTAGTTTTTAAATCGTCCGGTC | CCTATTACAATTCAAACCCGAA      |
| <b>FoxA2 (-1974)</b>           | GAGTTTTTAGTATTCGGGGGATC    | CATAAAAAAAAAACATTAATAAACCCG |
| <b>FoxA2 (-2656)</b>           | GTATTTTTATGGGTAGGCGTGTC    | CTAACGAAATTCTAAAAACTCCGAT   |
| <b>Non-Specific</b>            | ATTTAATACGATTTTGTGATTCGT   | AAAAAAAAACTAAATTTTCCCGC     |
| <b>MSP Primers (Mouse)</b>     |                            |                             |
| <b>FoxA2</b>                   | TTAGAAAGAGGATTGAGGTAATTGAC | CAAATAACAACCAATTTACAAAACG   |
| <b>Non-Specific</b>            | TTCAGTCCAAAAGGATGCTG       | GGATACAGTCCCAAACCTCTTC      |
| <b>Antibody</b>                |                            |                             |
| <b>Protein</b>                 | <b>Company</b>             | <b>Catalogue number</b>     |
| <b>FoxM1</b>                   | Santa Cruz                 | SC-500                      |
| <b>FoxM1</b>                   | Santa Cruz                 | SC-376471                   |
| <b>FoxA2</b>                   | Santa Cruz                 | SC-374376                   |
| <b>Rb</b>                      | Cell Signaling             | CST9309                     |
| <b>DNMT3b</b>                  | Imgenex                    | 52A1018                     |
| <b>Actin</b>                   | Sigma                      | AC-40                       |
| <b>GAPDH</b>                   | Cell Signaling             | CST5174                     |

## **Supplemental Methods:**

### **Soft Agar Assay**

For transformation and anchorage independent colony formation ability, soft agar assay was performed. Cells ( $2 \times 10^4$ ) were suspended in a medium containing 0.4% agarose and then poured onto 60mm culture dish coated with 0.8% agarose. The top agar surface was layered with complete medium every third day and cells were allowed to grow for 20 days. Colonies larger than 1mm in soft agar were stained with 0.1% crystal violet for counting and capturing images.

### **Clonogenic assay**

To check the effect of the FoxA2 on FoxM1 expressing cell line proliferation, clonogenic assay was performed with Huh7 cells transfected with Control, T7-FoxM1, CMV-FoxA2 and co-transfected with T7-FoxM1 and FoxA2 were seeded at the density of  $1 \times 10^4$  cell in 24 well plate. Cells were feed with fresh medium every third day and were allowed to grow for 6 days. At the end of the assay, pictures of the cells were captured under bright field microscope after staining with crystal violet solution (0.1% crystal violet in 10% ethanol). Stained colonies were counted.

### **Supplemental Figure Legends:**

**Figure S1: Expression of FoxM1 and FoxA2 in normal liver:** (A) Upper panel shows the expression pattern of FoxM1 and FoxA2 in non-tumor human liver. (B) lower panel shows the expression in mouse normal liver. Image scale bar is 50 $\mu$ m in upper panel and 100 $\mu$ m in lower panel.

**Figure S2: FoxM1 regulates the expression of FoxA2 in human HCC cells:** (A) Equal amounts (100 $\mu$ g) of SNU449, Huh7 and HepG2 cell extracts were resolved by SDS-PAGE and western blot was performed with antibodies against FoxM1 and Actin. (B) Expressions of FoxM1 transgene in Huh7 and HepG2 are shown (C) Huh7 and HepG2 cells were transfected with empty vector (control) or vector expressing T7-FoxM1b. Forty-eight hours post transfection, cells were harvested for protein and RNA assays. Total protein (70  $\mu$ g) of whole cell extracts were subjected to western blotting for the relative expression of FoxM1 and FoxA2. The western blot panel for FoxM1 expression was exposed for less than a second, whereas the other panels were exposed for greater than 10 seconds. Huh7 cells (D) and SNU449 cells (E) were transfected with control-siRNA or FoxM1-siRNAs. Seventy-two hours after siRNA transfection, cells were harvested for RNA and protein assays. Whole cell (100  $\mu$ g) extracts were resolved through SDS-PAGE and Western blots were performed for the respective proteins. Blots were exposed for greater than 10 sec. (F) Single cell clones of Huh7 cells stably expressing pINDUCER-shFoxM1 and pINDUCER-RFP as control were treated with 300ng of doxycycline for four days, at the end of treatment cells were harvested and subjected to western blotting with antibodies against FoxM1, FoxA2 and Actin. The number above each band in western blots represents Image J quantification relative to control set at 1. Result is the representative of three independent experiments.

**Figure S3: Predicted FoxM1 binding site in the FoxA2 promoter and assessment of FoxM1 interaction along with Rb and DNMT3b:** (A) Schematic shows the predicted FoxM1 binding sites (Red) (MacVector) and the CpG methylation islands (sky blue) (Methprimer tool <http://www.urogene.org>) on the human FoxA2 promoters. (B) Equal amounts (1mg) of Huh7 cell extracts were used for immunoprecipitation assay with anti-FoxM1 and anti-IgG. Immunoprecipitates were resolved by SDS-PAGE and co-immunoprecipitation of Rb and DNMT3b were confirmed by using respective antibodies as shown in the figure. SNU449 cells were subjected to crosslinking for chromatin-IP (ChIP). The chromatin preparations were immunoprecipitated with FoxM1-ab (C) or Rb-ab (D) or DNMT3b (E) or IgG as control. Enrichments of the FoxA2 promoter fragments were assayed by quantitative RT-PCR, and the relative enrichments with FoxM1-ab, Rb-ab and DNMT3b-ab over that with IgG, after normalization against a non-specific site, are shown. (F) Huh7 cell transfected with either control vector or T7-FoxM1 expression vector, 48h post transfection cells were harvested and isolated genomic DNA was subjected to bisulphite conversion followed by identification of CpG island on FoxA2 promoter. (G) Huh7 cells transfected with control siRNA or FoxM1 siRNA. Extracts were subjected to western blot to confirm the extent of FoxM1 knock down. Western blots were analyzed using Image J software followed by intensity calculation against control band set at 1. Statistical calculations were done using GraphPad Prism online tool for t-test and p values stated as \* $p \leq 0.05$ , \*\* $p \leq 0.01$ , \*\*\* $p \leq 0.001$  and error bar represents  $\pm$ SE. Result is the representative of three independent experiments.

**Figure S4: Regulation of the mouse FoxA2 promoter by FoxM1:** (A) RNA assay showing knock down of DNMT3b in SNU449 cells. (B) DNA from SNU449 cells, 72h after transfection with control-siRNA or DNMT3b-siRNA were isolated and subjected to bisulphite conversion

followed by methylation specific pcr covering CpG island on FoxA2 promoter. (C) DNA from DNMT3b knock down SNU449 cells were isolated and subjected to quantitative real time PCR for DNMT3b and FoxA2 mRNAs. (D) Mouse FoxA2 promoter: Site of MSP (-1553bp to -1369bp upstream of transcription start site (TSS)), Non-Specific site (-4499bp to -4349bp). Schematic has been generated using Methprimer tool from <http://www.urogene.org>. (E) Genomic DNA was isolated from the FoxM1 +/+ and Fox F1/F1 mice tumor were subjected to bisulphite conversion followed by identification of CpG island in the FoxA2 promoter by CYBR green qPCR. (F) Equal amount (1mg) of protein extract from the FoxM1 +/+ and Fox F1/F1 mice tumor were used for immunoprecipitation assay with anti-FoxM1 and anti-IgG. Immunoprecipitates were resolved by SDS-PAGE and co-immunoprecipitation of Rb and DNMT3b were confirmed by using respective antibodies as shown in the figure. Western blots were analyzed using Image J software followed by intensity calculation against control band set at 1. Statistical calculations were done using GraphPad Prism online tool for t-test and p values stated as \* $p \leq 0.05$ , \*\* $p \leq 0.01$ , \*\*\* $p \leq 0.001$  and error bar represents  $\pm$ SE. Result is the representative of three independent experiments.

**Figure S5: Doxycycline does not affect the expression of FoxM1 and FoxA2 in control cells.**

Doxycycline inducible Huh7-pINDUCER-RFP and Huh7-pINDUCER-shFoxM1 cells were either mock treated or treated with 300ng/ml of Doxycycline for 4 days. RNAs corresponding to the indicated genes were assayed by quantitative real time PCR. Statistical calculations were done using GraphPad Prism online tool for t-test and p values stated as \* $p \leq 0.05$  and \*\* $p \leq 0.001$  and \*\*\* $p \leq 0.0001$ .

**Figure S6: FoxA2 inhibits expression of FoxM1 and its downstream targets, whereas FoxM1 downregulation increases the hepatic differentiation genes.** (A) SNU449 cells were

transfected with empty vector or FoxA2 expression plasmid. Two hundred cells were then seeded in sphere formation medium in low attachment petri dishes. Cells were allowed to grow for a week. Spheres were counted, and representative picture was captured under bright field microscope. (B) SNU449 cells were transfected with empty vector, and FoxA2, 48h post transfection, RNA was isolated, and cDNA was made. cDNA was subjected to qRT-PCR. Effects of FoxA2 on FoxM1, Survivin, AuroraB were assayed. (C) Huh7 cells were transfected with either empty vector or FoxA2 expression vector, 48h post transfection cells were harvested and mRNA assay was performed as depicted. (D) SNU449 cells transfected with either control siRNA or FoxM1 siRNA for 72 hours were used to assay the effect of FoxM1 knock down on hepatic differentiation gene such as ALB, AAT and HNF4 $\alpha$ . Statistical calculations were done using GraphPad Prism online tool for t-test and p values stated as \* $p \leq 0.05$ , \*\* $p \leq 0.01$ , \*\*\* $p \leq 0.001$  and error bar represents  $\pm$ SE. Result is the representative of three independent experiments. Image scale bar is 500 $\mu$ m.

**Figure S7: FoxA2 inhibit FoxM1-induced clonogenicity and anchorage independent growth of the Huh7 cells:** (A) Huh7 cells were transfected individually with empty vector, Flag-FoxM1 or FoxA2 or a combination of Flag-FoxM1 and FoxA2, along with GFP expression plasmid as transfection control. The transfected cells were subjected to clonogenicity or soft agar assay. About  $1 \times 10^4$  cells were seeded in triplicate in 24 well plate and allowed to grow for one week. Cells were fixed and stained with crystal violet and pictures were taken under light microscope. (B) Quantification of the colonies is shown. (C) Huh7 cells ( $2 \times 10^4$  cells) as described in panel (A) were seeded into soft agar in triplicate and allowed to grow for 20 days and the representative appearances are shown. (D) Graph shows the quantification of number of distinctly visible colonies with unaided eye. (E) Huh7 cells as described in panel (A) were lysed forty-eight hours

after transfection, and 70 ug of extracts were resolved on SDS-PAGE. Expressions of FoxM1 and FoxA2 were assayed by western blotting with anti-Flag, anti-FoxM1, anti-FoxA2 antibodies. For loading control, actin-ab and anti-GFP antibody were used. For the over-expressed Flag-FoxM1b, FoxA2 short exposure ( $t < 1$  sec) of the blots was taken. Western blots were analyzed using Image J software followed by intensity calculation against control band set at 1. Statistical calculations were done using GraphPad Prism online tool for t-test and p values stated as  $*p \leq 0.05$ ,  $**p \leq 0.001$  and  $***p \leq 0.0001$ . Image scale bar is 500 $\mu$ m.

Figure S1

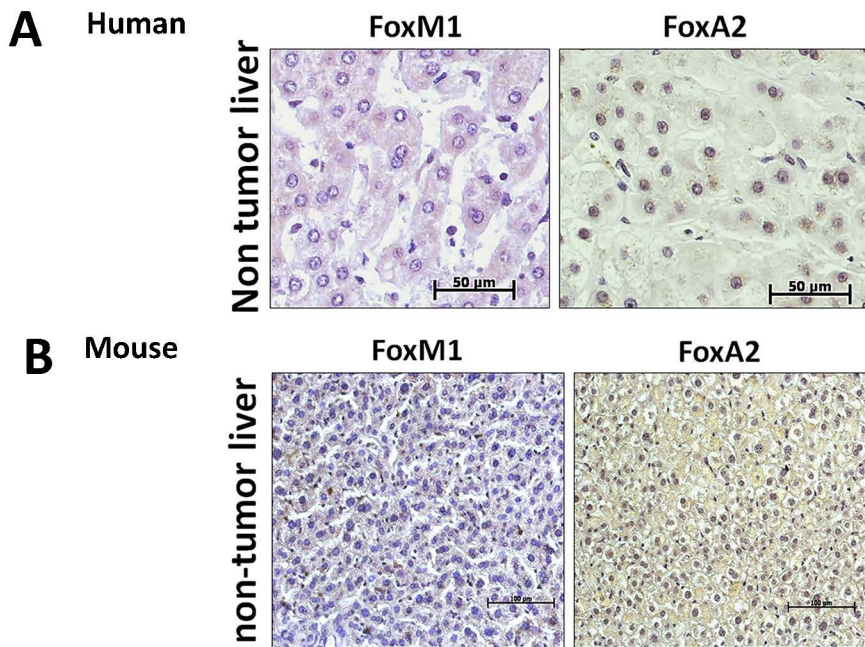



**A**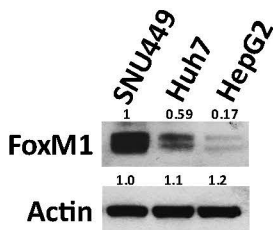**B**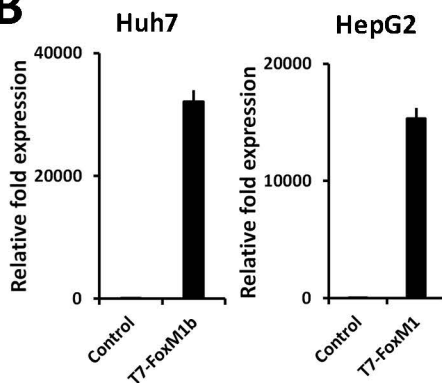**C**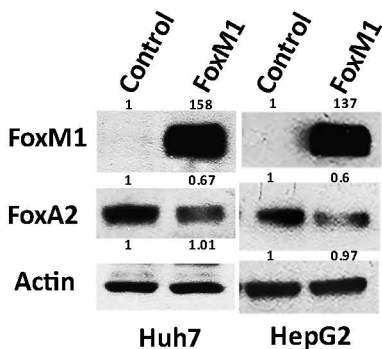**D**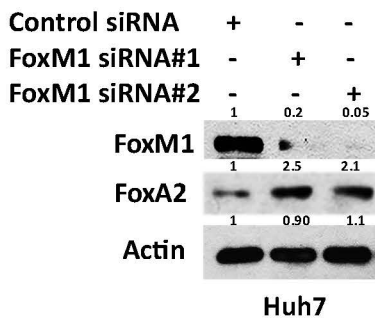**E**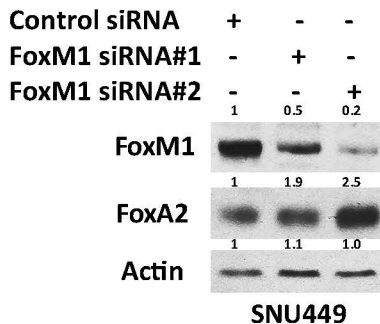**F**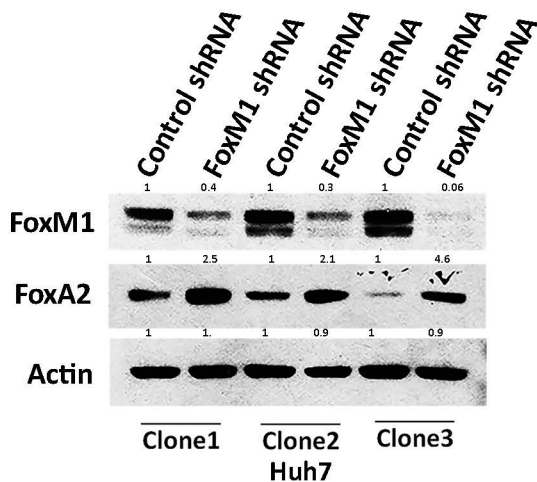

A

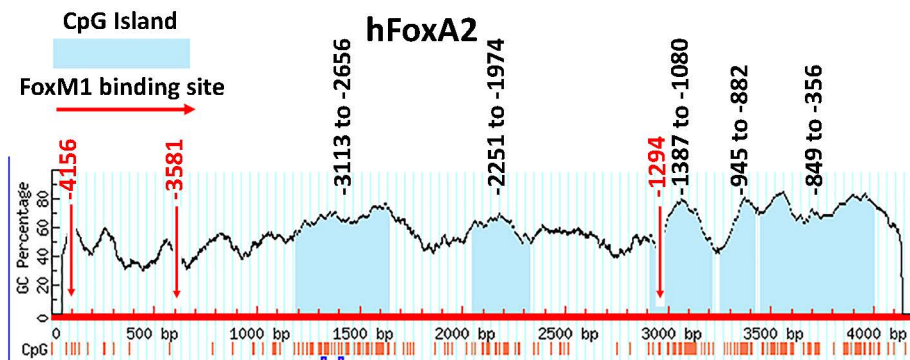

B

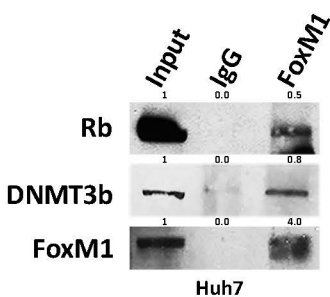

C

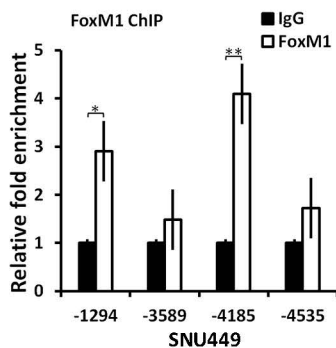

D

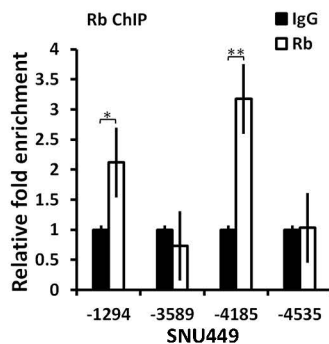

E

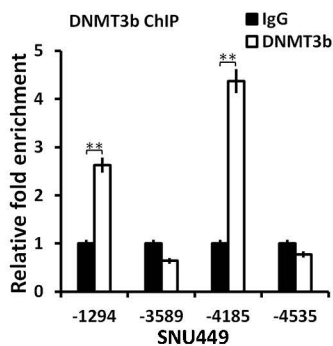

F

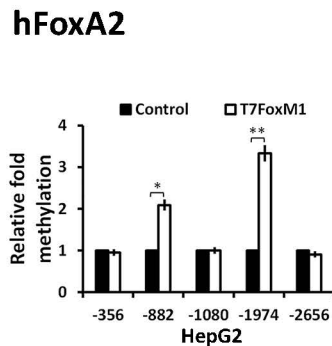

G

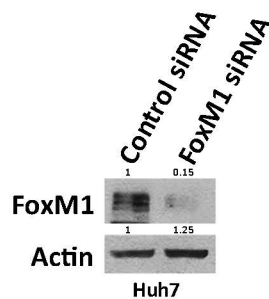

Figure S4

A

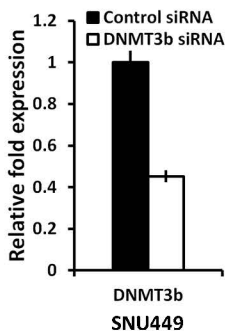

B

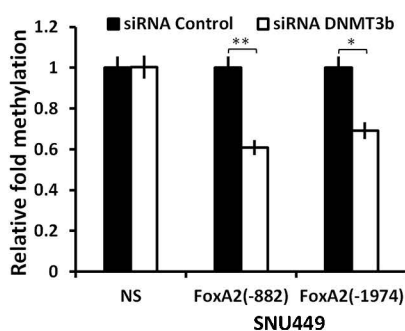

C

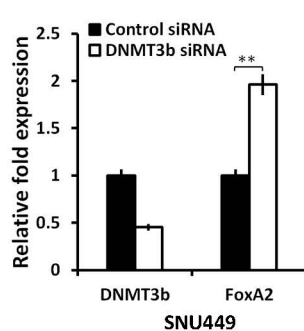

D

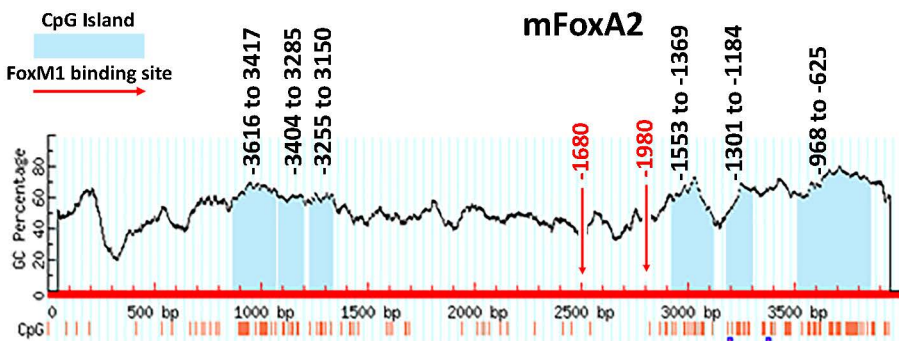

E

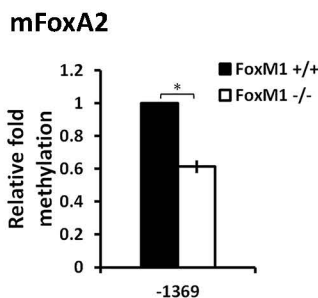

F

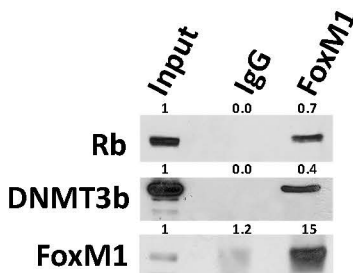

Figure S5

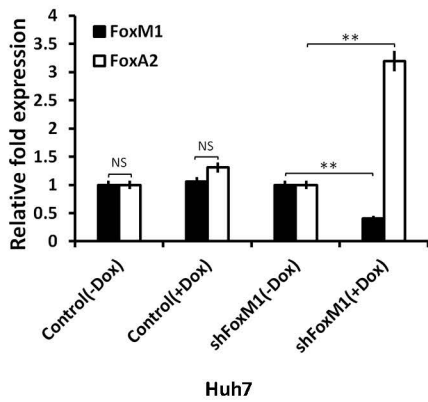

Figure S6

**A**

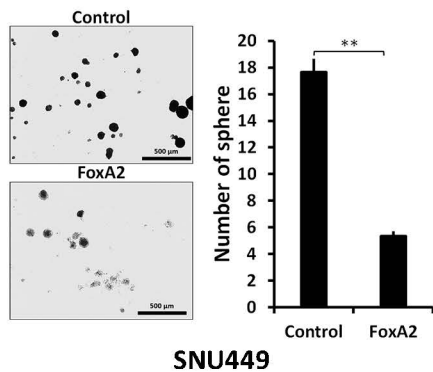

**B**

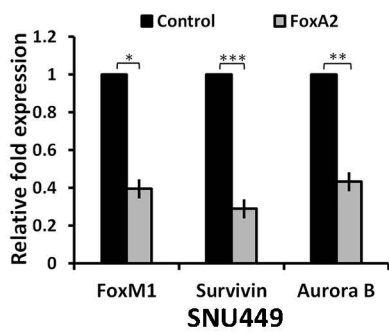

**C**

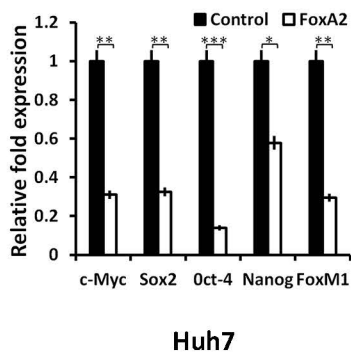

**D**

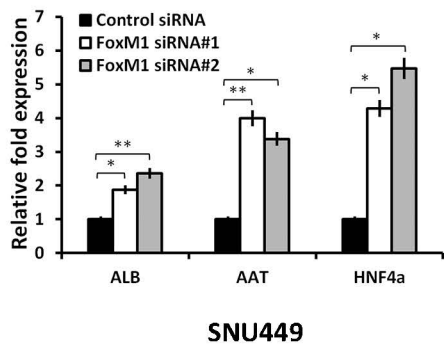

Figure S7

**A**

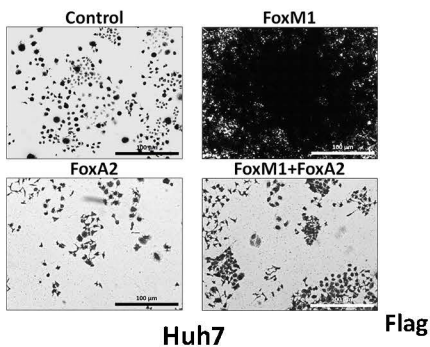

**B**

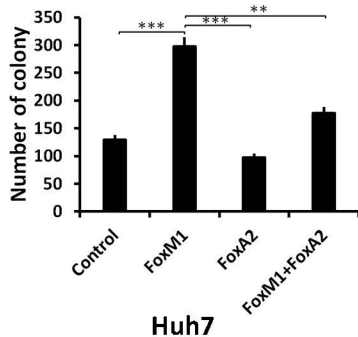

**C**

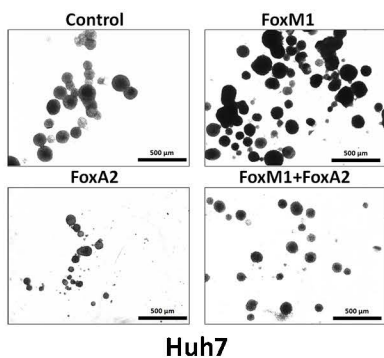

**D**

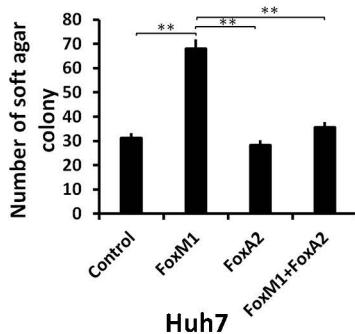

**E**

| Flag-FoxM1 | - | +    | -   | +    |
|------------|---|------|-----|------|
| FoxA2      | - | -    | +   | +    |
| GFP        | + | +    | +   | +    |
|            | 1 | 16.0 | 0.2 | 2.02 |

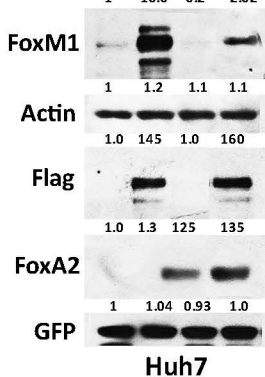

Supplement: NIHMS1522826-supplement-1.pdf [file NIHMS1522826-supplement-1.pdf]
